# Supplementary material for: Highly dispersed Pd nanoparticles on a SiO2 support for dehydrogenation of dodecahydro-N-ethylcarbazole
Source: Royal Society of Chemistry journal article supplement (doi:10.1039/d3nj05733j), 2024-01-01
Supplement: d3nj05733j1.pdf [file d3nj05733j1.pdf]

## Supplementary Information

### Highly dispersed Pd nanoparticle on SiO<sub>2</sub> support for dehydrogenation of Liquid Organic Hydrogen Carriers

Monan Shi, Chunying Zhang, Mengnan Ma, Chen Zhang\* and Long Huang\*

*Beijing Key Laboratory of Enze Biomass Fine Chemicals, School of New Materials  
and Chemical Engineering, Beijing Institute of Petrochemical Technology, Beijing  
102617, PR China.*

*E-mail: zhangc@bipt.edu.cn, huangl@bipt.edu.cn*

- 1. Calculation of metal particle sizes**
- 2. Kinetic parameter calculations**
- 3. Calculation of Turnover frequency (TOF)**

---

## 1. Calculation of metal particle sizes

The particle sizes were calculated based CO pulse adsorption experiments using following equations<sup>1</sup>. The specific surface area  $A$  (m<sup>2</sup>/g) is given by:

$$A = \frac{nV_m N_A a_m}{22414 \cdot m}$$

where,  $n$  is the stoichiometric coefficient,  $V_m$  the chemisorption volume (cm<sup>3</sup>),  $N_A$  the Avogadro's number ( $6.02 \times 10^{23}$  mol<sup>-1</sup>),  $a_m$  the metal cross-section area of an atom (m<sup>2</sup>),  $m$  the metal mass of the sample (g).

The metal particle size  $D_m$  (m) could then be calculated by:

$$D_m = \frac{6}{\rho A}$$

where  $\rho$  represents the metal density (g/m<sup>3</sup>).

---

## 2. Kinetic parameter calculations

The kinetic parameters of 0.3%Pd-NH<sub>2</sub>(1) and 0.3%Pd-IM were calculated in this study. The dehydrogenation process of 12H-NECZ can be divided into the following three elementary reactions:<sup>2, 3</sup>

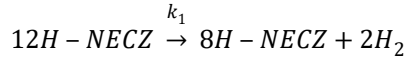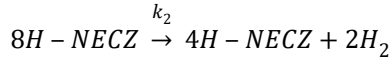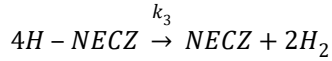

where  $k_1$ ,  $k_2$ , and  $k_3$  represent rate constants of three elementary reactions. All three reactions were reported to follow first-order kinetics<sup>4, 5</sup>. According to previous research, the reaction kinetics can also be approximated by the formation rate of 4H-NECZ in the following form:<sup>6, 7</sup>

$$r_1 = -\frac{dC_{12H-NECZ}}{dt} = k_1 C_{12H-NECZ}$$

$$r_2 \approx \frac{dC_{4H-NECZ}}{dt} = k_2 C_{4H-NECZ}$$

$$r_3 = \frac{dC_{NECZ}}{dt} = k_3 C_{NECZ}$$

These expressions could be integrated to obtain the analytical solutions. The rate constants were obtained by fitting with experimental results. The relationship between rate constants and temperature was described by Arrhenius equation:

$$k = Ae^{-\frac{E_a}{RT}}$$

where  $A$  is the pre-exponential factor and  $E_a$  is the activation energy.

---

### 3. Calculation of turnover frequency (TOF)

In this study, turnover frequency (TOF) for H<sub>2</sub> generation was calculated to demonstrate the reactivity difference of catalysts for each reaction steps. TOF for H<sub>2</sub> generation were defined as the amount of H<sub>2</sub> produced per active site in unit time. Specifically, TOF<sub>t</sub> is the total amount of H<sub>2</sub> produced on one active site per minute in 12H-NECZ dehydrogenation process. TOF<sub>1</sub>, TOF<sub>2</sub>, and TOF<sub>3</sub> are the amounts of H<sub>2</sub> produced per active site per minute in the three elementary dehydrogenation reactions: 12H-NECZ to 8H-NECZ (TOF<sub>1</sub>), 8H-NECZ to 4H-NECZ (TOF<sub>2</sub>), 4H-NECZ to NECZ (TOF<sub>3</sub>).

TOF<sub>t</sub> was calculated based on the total amount of H<sub>2</sub> released during the reaction process within the first hour using the following expression:

$$TOF_t = \frac{\text{amount of } H_2 \text{ released}}{\text{catalyst metal amount} \times \text{metal dispersion} \times \text{reaction time}}$$

TOF<sub>1</sub>, TOF<sub>2</sub>, and TOF<sub>3</sub> were calculated based on the product distribution of 8H-NECZ, 4H-NECZ and NECZ:

$$TOF_1 = TOF_t \times \frac{2 \times \text{amount of consumed } 12H - NECZ}{\text{amount of } H_2 \text{ release}}$$

$$TOF_3 = TOF_t \times \frac{2 \times \text{amount of produced } NECZ}{\text{amount of } H_2 \text{ released}}$$

$$TOF_2 = TOF_t - TOF_1 - TOF_3$$

---

## References

1. G. Bergeret and P. Gallezot, in *Handbook of Heterogeneous Catalysis*, DOI: <https://doi.org/10.1002/9783527610044.hetcat0038>, pp. 738-765.
2. M. Yang, C. Han, G. Ni, J. Wu and H. Cheng, *Int J Hydrogen Energ*, 2012, **37**, 12839-12845.
3. K. M. Eblagon, K. Tam and S. C. E. Tsang, *Energy Environ. Sci.*, 2012, **5**, 8621-8630.
4. F. Sotoodeh, L. Zhao and K. J. Smith, *Appl. Catal., A*, 2009, **362**, 155-162.
5. F. Sotoodeh and K. J. Smith, *Ind. Eng. Chem. Res.*, 2010, **49**, 1018-1026.
6. M. Yang, Y. Dong, S. Fei, H. Ke and H. Cheng, *Int J Hydrogen Energ*, 2014, **39**, 18976-18983.
7. Y. Dong, M. Yang, P. Mei, C. Li and L. Li, *Int J Hydrogen Energ*, 2016, **41**, 8498-8505.
